# Supplementary material for: Ultra-Deep Sequencing of Mouse Mitochondrial DNA: Mutational Patterns and Their Origins
Source: PLOS journal article supplement (doi:10.1371/journal.pgen.1002028), 2011-03-24
Supplement: S7 (10.1371/journal.pgen.1002028.s007) [file journal.pgen.1002028.s007]

**Supplementary Table S5.** Large deletions (>10bp) observed in the samples by the SplitSeek method.

| **deletion #** | **Start** | **Stop** | **Length** | **Samples** |
| --- | --- | --- | --- | --- |
| 1 | 4060 | 13765 | 9705 | Mut 30w |
| 2 | 4073 | 13765 | 9692 | Hz 40w |
| 3 | 5958 | 14910 | 8952 | Mut 30w |
| 4 | 11513 | 14261 | 2748 | Mut 30w |
| 5 | 4316 | 11847 | 7531 | Mut 30w |
